# Supplementary material for: Sol-gel preparation of mesoporous sodium aluminosilicate glasses: mechanistic and structural investigations by solid state nuclear magnetic resonance
Source: Royal Society of Chemistry journal article supplement (doi:10.1039/b900864k), 2009-01-01
Supplement: b900864k.pdf [file b900864k.pdf]

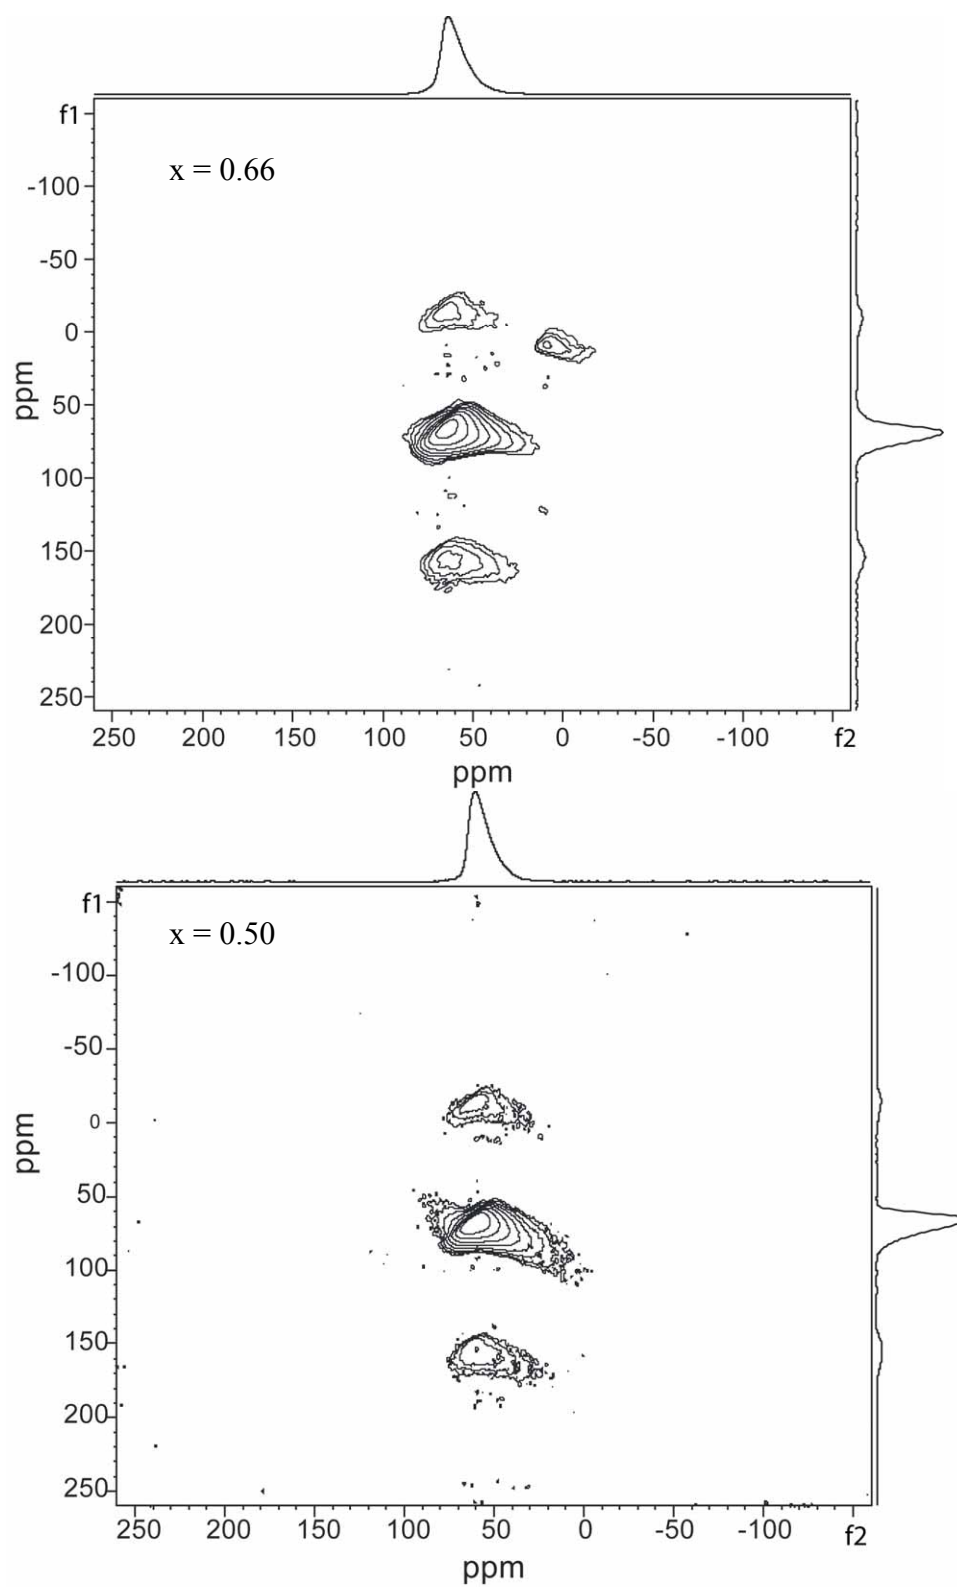

**Figure S-I:**  $^{27}\text{Al}$  TQMAS spectra of  $(\text{NaAlO}_2)_x\text{-(SiO}_2)_{1-x}$

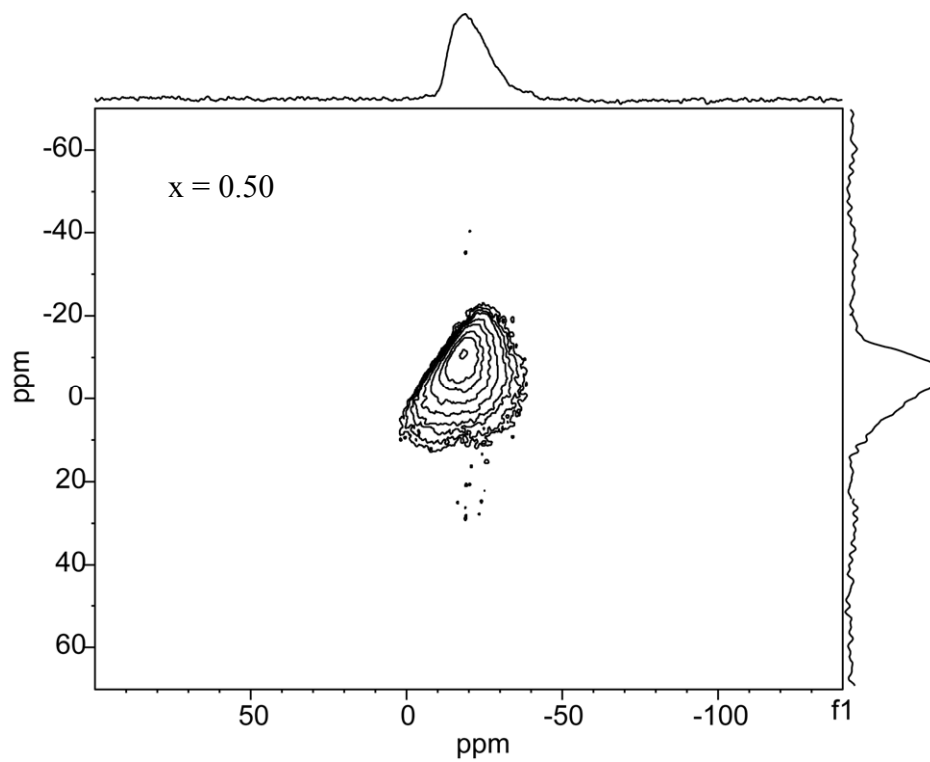

**Figure S-II.**  $^{23}\text{Na}$  TQMAS spectrum of  $(\text{NaAlO}_2)_{0.5}(\text{SiO}_2)_{0.5}$
